# Supplementary material
Source: publisher figshare collection journal article supplement (https://acs.figshare.com/ndownloader/files/4487410)
Supplement: Supplementary file 1 [file 4487410]

Raman measurements (JYHoriba LabRAM) were performed in backscattering configuration with an excitation line provided by a HeNe laser (632.8 nm wavelength, 10 mW at the sample) through an Olympus BX41 confocal microscope (100X objective, numerical aperture = 0.8). Each Raman spectrum was the result of averaging 10 scans with 10 seconds integration time in the 920-1700  $\text{cm}^{-1}$  region. SERS hot-spots are considered to be the dendrites branches, and thus localized by optical focusing on the surface.
